# Supplementary material for: Boosting Accuracy of Classical Machine Learning Antispam Classifiers in Real Scenarios by Applying Rough Set Theory
Source: Hindawi journal article supplement (doi:10.1155/2016/5945192), 2016-01-01
Supplement: f1 [file 5945192.f1.pdf]

```

1  import java.util.Vector;
2  import java.util.HashSet;
3  import java.util.Collections;
4  import java.util.Comparator;
5  import java.util.StringTokenizer;
6
7  /**
8   * Reference implementation of Rough Sets rule generation using boolean condition
9   * and decision attributes.
10  */
11  public class RoughtSets {
12      public static int DECISION_ATTRIBUTE_IDX=8;
13      public static int LAST_CONDITION_ATTRIBUTE_IDX=DECISION_ATTRIBUTE_IDX-1;
14
15      /**
16       * Computes all equivalence classes. The result is a vector of patterns instead
17       * of a vector of sets. A pattern is represented by the vector of values for the
18       * different attributes considered for computing the equivalence classes (a subset of
19       * a).
20       * @param data The data array containing condition and decision attribute values
21       *             for the e-mails.
22       * @param attributes Array containing the indices of attributes considered for
23       *                   computing
24       *                   classes
25       * @return A vector with the patterns (values for all condition attributes considered)
26       *         of the equivalence classes.
27       */
28      public static Vector<Vector<Boolean>> computeClasses(Boolean data[][], int
29      attributes[]){
30          Vector<Vector<Boolean>> result=new Vector<Vector<Boolean>>();
31
32          //For each data row
33          for (int i=0;i<data.length;i++){
34              //Compute a combination of attributes
35              Vector<Boolean> v=new Vector<Boolean>();
36              for (int j=0;j<attributes.length;j++)
37                  v.add(data[i][attributes[j]]);
38
39              //See if the combination has been computed and included before
40              boolean included=false;
41              for (int j=0;j<result.size() && !included;j++){
42                  Vector<Boolean> v2=result.get(j);
43                  boolean elEqual=true;
44                  for (int k=0;k<v.size() && elEqual;k++){
45                      elEqual=v.get(k).equals(v2.get(k)); //Lo normal
46                  }
47                  if (elEqual) included = true;
48              }
49              //If the combination was not found before, include it now.
50              if (!included){
51                  result.add(v);
52              }
53          }
54          return result;
55      }
56
57      /**
58       * Show an equivalence Class set using stdout
59       * @param classes Equivalence classes patterns computed
60       * @param attributes Attributes considered for computing the equivalence classes
61       */
62      public static void printEqClassSet(Vector<Vector<Boolean>> classes, int attributes[]){
63          int j=0;
64          for (Vector<Boolean> current:classes){
65              System.out.println("Class: "+(j++));
66              for (int i = 0 ; i<attributes.length; i++){
67                  System.out.print("a"+(i+1)+"="+current.get(i)?"true, ":"false, ");
68              }
69              System.out.println();
70          }
71      }
72
73      /**
74       * Compute the lower approximation for a concept. The concept should be included in the

```

```

75     * data matrix. The lower approximation is computed as a vector of equivalence class
76     patterns
77     * instead of a set of objects (e-mails).
78     * @param data Data matrix containing all attributes considered and also the concept
79     * @param attributes Attributes (column indices) considered to compute the lower
80     * @param concept Concept column index to compute the lower approximation
81     * @return set of equivalence classes patterns that conforms the lower approximation
82     */
83     public static Vector<Vector<Boolean>> lowerApprox(Boolean data[[[], int attributes[],
84     int concept){
85         Vector<Vector<Boolean>> eqClasses=computeClasses(data, attributes);
86         Vector<Vector<Boolean>> result=new Vector<Vector<Boolean>>();
87
88         //printEqClassSet(eqClasses,attributes);
89
90         //For each equivalence class
91         for (int i=0;i<eqClasses.size();i++){
92             Vector<Boolean> currentclass=eqClasses.get(i);
93             //Check if all instances included in the equivalence class are positive
94
95             boolean shouldBeIncluded=true;
96             boolean onePositive=false;
97             //for each instance see if it belongs to the class. If yes check if
98             //the class can be included in the lowerApprox
99             for (int j=0;j<data.length && shouldBeIncluded;j++){
100                 boolean belongs=true;
101                 for (int k=0;k<attributes.length && belongs;k++){
102                     belongs=(currentclass.get(k)==data[j][attributes[k]]);
103                 }
104                 //If current instance belongs current class, then, the current class
105                 //can be included into lowerApprox if its decision attribute is positive
106                 if (belongs){
107                     shouldBeIncluded=(
108                         data[j][concept]==null || data[j][concept]
109                     );
110                     onePositive=onePositive || data[j][concept]!=null && data[j][concept];
111                 }
112             }
113             //after checking all instances of the same class
114             //if the class still should be included, then include in the result of the
115             lowerApprox
116             if (shouldBeIncluded && onePositive) result.add(currentclass);
117         }
118     }
119     return result;
120 }
121 /**
122  * Compare two lower approximations to test if they are equivalent. This function is
123  * used to compute reducts.
124  * @param data Data considered for computing the lower approximations. The data
125  * is unique for both lower approximations but the attribute list may
126  * differ.
127  * @param la1 First lower approximation to compare given in the form of set of
128  * equivalence classes patterns
129  * @param at1 List of attribute indices considered for computing the first
130  * approximation
131  * @param la2 Second lower approximation to compare given in the form of set of
132  * equivalence classes patterns
133  * @param at2 List of attribute indices considered for computing the second
134  * approximation
135  * @param concept Attribute (column) index considered as decision attribute (concept)
136  * @return A value indicating if the lower approximations are equal
137  */
138     public static boolean equalLowerApprox(Boolean data[[[], Vector<Vector<Boolean>> la1,
139     int at1[], Vector<Vector<Boolean>> la2, int at2[], int concept){
140         boolean equal=true;
141
142         HashSet<Integer> dataRows1=new HashSet<Integer>();
143         HashSet<Integer> dataRows2=new HashSet<Integer>();
144         HashSet<Integer> allRows=new HashSet<Integer>();
145
146         //For each instance in the first lower approximation

```

```

145     for (int i=0;i<la1.size();i++){
146         Vector<Boolean> la1current=la1.get(i);
147
148         //For each instance j, see if it fits with i class pattern to build a vector
149         of
150         //instances that fits with i pattern
151         for (int j=0;j<data.length;j++){
152             boolean instanceFits=true;
153             for (int k=0; k<at1.length && instanceFits;k++){
154                 instanceFits=(data[j][at1[k]]==la1current.get(k));
155             }
156             //If instance fits, it is included into the vector of instances that
157             matches la1
158             if (instanceFits){
159                 dataRows1.add(j);
160                 allRows.add(j);
161             }
162         }
163
164         //For each instance in the first lower approximation
165         for (int i=0;i<la2.size();i++){
166             Vector<Boolean> la2current=la2.get(i);
167
168             //For each instance j, see if it fits with i class pattern to build a vector of
169             //instances that fits with i pattern
170             for (int j=0;j<data.length;j++){
171                 boolean instanceFits=true;
172                 for (int k=0; k<at2.length && instanceFits;k++){
173                     instanceFits=(data[j][at2[k]]==la2current.get(k));
174                 }
175                 //If instance fits, it is included into the vector of instances that matches
176                 la2
177                 if (instanceFits){
178                     dataRows2.add(j);
179                     allRows.add(j);
180                 }
181             }
182
183             equal=dataRows1.equals(dataRows2);
184
185             //Check equivalence for concepts that handle null values
186             if (!equal){
187                 equal=true;
188                 /*Compute those ones that does not fit and see if they have null for the
189                 concept/decision attribute */
190                 for (Integer j:allRows){
191                     if (!dataRows1.contains(j) || !dataRows2.contains(j))
192                         equal=(data[j][concept]==null);
193                 }
194             }
195
196             return equal;
197         }
198
199     /**
200     * Used internally to store reducts into a variable avoiding repeating them
201     * @param reduct Set of attribute (column) indices composing the reduct
202     * @param reducts Vector to store the reducts. This is a Input/Output parameter
203     */
204     private static void addReduct(int reduct[], Vector<String> reducts){
205         String currentReduct=new String();
206
207         for (int k=0;k<reduct.length;k++){
208             currentReduct+="a"+(reduct[k]+1)+(k==reduct.length-1?" ":" ");
209         }
210
211         boolean found=false;
212         for (int i=0;i<reducts.size() && !found;i++){
213             found=reducts.get(i).equals(currentReduct);
214         }
215         if (!found)
216             reducts.add(currentReduct);
217     }

```

```

218
219  /**
220   * Print a list of reducts using stdout
221   * @param reducts List of reducts to print
222   */
223 public static void printReducts(Vector<String> reducts){
224     for (int i=0;i<reducts.size();i++){
225         System.out.println("Reduct: "+reducts.get(i));
226     }
227 }
228
229 /**
230  * This internal function is able to recursively find reducts for a given data and a
231  * given concept.
232  * As a reducts should be minimal, when a candidate for reduct is found, we should
233  * recursively
234  * test if we can found a reduct drooping some attributes from candidate. Recursion is
235  * a good choice for doing that. However, we are aware that recursion could be avoided
236  * using a Stack data structure.
237  * @param data Data considered to compute the reducts. Should contain A (condition
238  * attribute matrix)
239  * and X (decision attribute matrix).
240  * @param currentAttributes Attributes (columns) indices considered to compute the
241  * reducts. Initially this should be initialized to handle all
242  * condition attribute (A) indices.
243  * @param concept The concept (decision attribute or X) index considered to compute the
244  * reducts.
245  * @param reducts Is a input/output parameter that contains the reducts found
246  * recursively.
247  * Initially, it should be contain a void vector. When the function
248  * ends,
249  * this vector will have all reducts found.
250  * @return True if a reduct is found. This is useful to take advantage of recursion to
251  * compute reducts.
252  */
253 private static boolean _computeReducts(Boolean data[][], int currentAttributes[], int
254 concept, Vector<String> reducts){
255     Vector<Vector<Boolean>> lowerApproxCurrentAttributes=lowerApprox(data,
256 currentAttributes, concept);
257     Vector<Vector<Boolean>> lowerApproxProposal;
258     boolean foundReduct=false;
259
260     if (currentAttributes.length==0){
261         return false;
262     }else if (currentAttributes.length==1){
263         addReduct(currentAttributes,reducts);
264         return true;
265     }
266
267     //Drop one attribute and, check if there is reduct using this subset of features. If
268     //found a reduct with a subset of attributes of currentAttributes param,
269     currentAttributes
270     //is not a reduct.
271     for (int i=0;i<currentAttributes.length;i++){
272         int proposal[]=new int[currentAttributes.length-1];
273         for (int k=0;k<currentAttributes.length-1;k++){
274             if (k<i) proposal[k]=currentAttributes[k];
275             else if (k>=i) proposal[k]=currentAttributes[k+1];
276         }
277
278         lowerApproxProposal=lowerApprox(data, proposal, concept);
279
280         //proposal is a reduct candidate if the lower approximations of the concept
281         computed with proposal attributes
282         //is equivalent to the one computed by the initial attribute set.
283         if (equalLowerApprox(data, lowerApproxCurrentAttributes, currentAttributes,
284 lowerApproxProposal, proposal, concept)){
285
286             //If proposal is a reduct candidate, and we can not find reducts by dropping
287             attributes, then proposal is a reduct.
288             if (!_computeReducts(data, proposal, concept, reducts))
289                 addReduct(proposal,reducts);
290
291             //Both if proposal is finally a reduct, or if we can found a subset of
292             features included in proposal
293             //that is a reduct, we found a reduct. Therefore, the original attribute set

```

```

280         (currentAttributes parameter)
281         //is not a reduct.
282         foundReduct=true;
283     }
284 }
285
286 // If we were not able to found a reduct using a subset of features included in
287 //then currentAttributes is a reduct.
288 if (!foundReduct){
289     addReduct(currentAttributes,reducts);
290 }
291 return foundReduct;
292 }
293
294 /**
295  * Computes the reducts for a given data (condition and decision attributes), the
296  * indices for condition attributes and the index for the decision or concept
297  * attribute.
298  * @param data Data considered to compute the reducts. Should contain A (condition
299  * attribute matrix)
300  * and X (decision attribute matrix).
301  * @param currentAttributes Attributes (columns) indices considered to compute the
302  * reducts. Initially this should be initialized to handle all
303  * condition attribute (A) indices.
304  * @param concept The concept (decision attribute or X) index considered to compute the
305  * reducts.
306  * @return Reducts for the given data sorted by size.
307 */
308 public static Vector<String> computeReducts (Boolean data[][], int currentAttributes[],
309 int concept){
310     Vector<String> reducts=new Vector<String>();
311     _computeReducts(data, currentAttributes, concept, reducts);
312
313     Collections.sort(reducts,new Comparator<String>(){
314         public int compare(String x,String y){
315             return x.length()-y.length();
316         }
317     });
318     return reducts;
319 }
320
321 /**
322  * Check if a data row (object) fits to an equivalence class pattern
323  * @param data Data considered to check. Should contain A (condition attribute matrix)
324  * and can contain X (decision attribute matrix).
325  * @param objIdx Object (row) index for the object to check if it belongs to class.
326  * @param attributes Attributes considered when we computed the equivalence classes
327  * set.
328  * The same ones should be used for comparison purposes.
329  * @param classPattern Equivalence class pattern that should be checked
330  * @return a boolean value indicating if the object belongs to class or not
331 */
332 private static boolean belongsClass(Boolean data[][], int objIdx, int attributes[],
333 Vector<Boolean> classPattern){
334     boolean belongs=true;
335     for (int k=0;k<attributes.length && belongs;k++){
336         belongs=(classPattern.get(k)==data[objIdx][attributes[k]]);
337     }
338     return belongs;
339 }
340
341 /**
342  * Find a class pattern from a set of class patterns that fits with an specific object
343  * @param data Data considered to check. Should contain A (condition attribute matrix)
344  * and can contain X (decision attribute matrix).
345  * @param objIdx Object (row) index for the target object.
346  * @param attributes Attributes considered when we computed the equivalence classes
347  * set.
348  * The same ones should be used for comparison purposes.
349  * @param classes The Vector for patterns to select the most appropriate one
350  * @return A pattern for an equivalence class that fits current object. Null if

```

```

348     *           we were not able to found a suitable pattern.
349     */
350     private static Vector<Boolean> findClass(Boolean data[][], int objIdx, int
attributes[], Vector<Vector<Boolean>> classes){
351         boolean found=false;
352         Vector<Boolean> current=null;
353
354         for (int i=0;i<classes.size() && !found ;i++){
355             current=classes.get(i);
356             found=belongsClass(data, objIdx,attributes, current);
357         }
358
359         return found?current:null;
360     }
361
362     /**
363     * Used internally to find the occurrences of a char into a string
364     * @param target the target string to count occurrences
365     * @param needle the character to check
366     * @return the number of occurrences of the char in the string
367     */
368     private static int countOccurrences(String target, char needle){
369         int count = 0;
370         for (int i=0; i < target.length(); i++)
371             if (target.charAt(i) == needle)
372                 count++;
373         return count;
374     }
375
376     /**
377     * Shows a matrix of data (A and X)
378     * @param mat Matrix of data to show
379     */
380     public static void showMatrix(Boolean mat[][]){
381         for (int i=0;i<mat.length;i++){
382             for (int j=0;j<mat[0].length;j++){
383                 if (j<mat[0].length-1)
384                     System.out.print(mat[i][j]+", ");
385                 else
386                     System.out.print(mat[i][j]);
387                 System.out.println();
388             }
389         }
390
391     /**
392     * Generate a ruleset from the given data to guess a specific decision attribute.
393     * @param data Data considered to compute the reducts. Should contain A (condition
attribute matrix)
394     *           and X (decision attribute matrix).
395     * @param attributes Attributes (columns) indices considered to compute the
396     *           reducts. Initially this should be initialized to handle all
397     *           condition attribute (A) indices.
398     * @param decisionAttr Decision attribute index in data to be considered in rule
generation
399     * @return Array of strings where each string contains a rule.
400     */
401     public static String[] generateRules(Boolean data[][], int attributes[], int
decisionAttr){
402         //attributes selected for MatX
403         int matXAttrs[]=new int [data[0].length-1];
404         for (int i=0;i<matXAttrs.length;i++) matXAttrs[i]=i;
405
406         //Attributes of Q
407         int qAttrs[]=new int[1];
408         qAttrs[0]=decisionAttr;
409
410         Vector<Vector<Boolean>> classes=computeClasses(data, qAttrs);
411         HashSet<String> rules=new HashSet<String>();
412
413         for (int i=0;i<data.length;i++){ //Para cada objeto
414             Vector<Boolean> elementClass=findClass(data, i, qAttrs, classes);
415
416             Boolean matX[][]=new Boolean[data.length][data[0].length];
417             for (int j=0;j<data.length;j++)
418                 for (int k=0;k<data[0].length;k++)
419                     if (k<data[0].length-1)

```

```

420         matX[j][k]=data[j][k];
421     else if (j==i)
422         matX[j][k]=true;
423     else if (belongsClass(data, j, qAttrs, elementClass))
424         matX[j][k]=null;
425     else
426         matX[j][k]=false;
427
428     Vector<String> matXReducts=new Vector<String>();
429     _computeReducts(matX, matXAttrs, decisionAttr, matXReducts);
430
431     //Select the shortest reduct
432     Collections.sort(matXReducts,new Comparator<String>(){
433         public int compare(String x,String y){
434             return countOccurrences(x, ',')-countOccurrences(y, ',');
435         }
436     });
437     String shortestReduct=matXReducts.get(0);
438
439     StringTokenizer st = new StringTokenizer(shortestReduct, ",", false);
440
441     String currentRule="if ";
442     while (st.hasMoreTokens()) {
443         String att=st.nextToken();
444         int attIdx=Integer.parseInt(att.substring(1))-1;
445         currentRule+=att+" = "+data[i][attIdx]+(st.hasMoreTokens()?" and ":" ");
446     }
447     currentRule+="then d1 = " + data[i][decisionAttr];
448     rules.add(currentRule);
449 }
450 String ret[]=new String[rules.size()];
451 int i=0;
452 for(String j:rules){
453     ret[i]=j;
454     i++;
455 }
456
457 return ret;
458 }
459
460 /**
461  * Launches a test of the class developed to test the data shown in the
462  * manuscript
463  * @param args Array of args received from command line (no one expected)
464  */
465
466 public static void main (String args[]){
467     /*
468     Example of data used in the paper. Columns 0-7 are the values for the
469     condition attributes while column 8 contains the decision attribute (spam).
470     Each row represents the different values for a concrete e-mail. In the paper
471     this represents A and X matrixes.
472     */
473     Boolean sampleData[][]={
474         {false, false, false, true, true, false, true, false, true },
475         {false, true, true, false, false, false, false, false, false},
476         {true, true, true, false, false, true, false, false, false},
477         {false, false, false, true, false, false, false, true, true },
478         {false, false, false, false, false, false, true, true, true },
479         {true, true, false, true, false, true, false, false, false}
480     };
481
482     //Show data
483     System.out.println("Data");
484     RoughtSets.showMatrix(sampleData);
485
486     //Build the condition attribute index list
487     int currentAttributes[]=new int[LAST_CONDITION_ATTRIBUTE_IDX+1];
488     for (int i=0;i<currentAttributes.length;i++){
489         currentAttributes[i]=i;
490     }
491
492     //Compute reducts
493     Vector<String> reducts=RoughtSets.computeReducts(sampleData,
494     currentAttributes,DECISION_ATTRIBUTE_IDX);
495     //Show reducts for spam (last attribute of data)

```

```
495     System.out.println("Reducts for x: ");
496     RoughtSets.printReducts(reducts);
497
498     //Compute rules
499     String rules[]=RoughtSets.generateRules(sampleData, currentAttributes,
        DECISION_ATTRIBUTE_IDX);
500     //Show rules
501     System.out.println("Rules: ");
502     for (String current:rules) System.out.println(current);
503 }
504 }
505
```
